# Supplementary material
Source: publisher figshare collection journal article supplement (https://acs.figshare.com/ndownloader/files/4056520)
Supplement: Supplementary file 1 [file 4056520]

## Supplementary information

### **Three-Dimensional Scaffolds to Evaluate Tumor Associated Fibroblast-Mediated Suppression of Breast Tumor Specific T Cells**

**Vy Phan-Lai<sup>a,b</sup>, Stephen J. Florczyk<sup>b</sup>, Forrest M. Kievit<sup>b</sup>, Kui Wang<sup>b</sup>, Ekram Gad<sup>a</sup>, Nora L. Disis<sup>a</sup>, and Miqin Zhang<sup>b,\*</sup>**

*<sup>a</sup>Department of Medicine, University of Washington, Seattle, Washington 98109*

*<sup>b</sup>Department of Materials Science & Engineering, University of Washington, Seattle, Washington 98195*

## Supplemental Figures

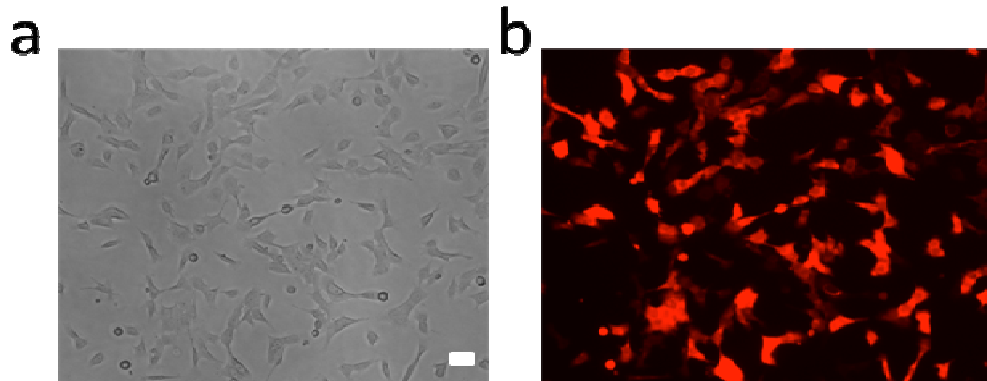

**Supplemental Figure 1.** RFP expression in stably transfected MMC-RFP line. (a) Brightfield phase contrast image and (b) fluorescence image of MMC-RFP cell line; scale bar, 10  $\mu\text{m}$ .

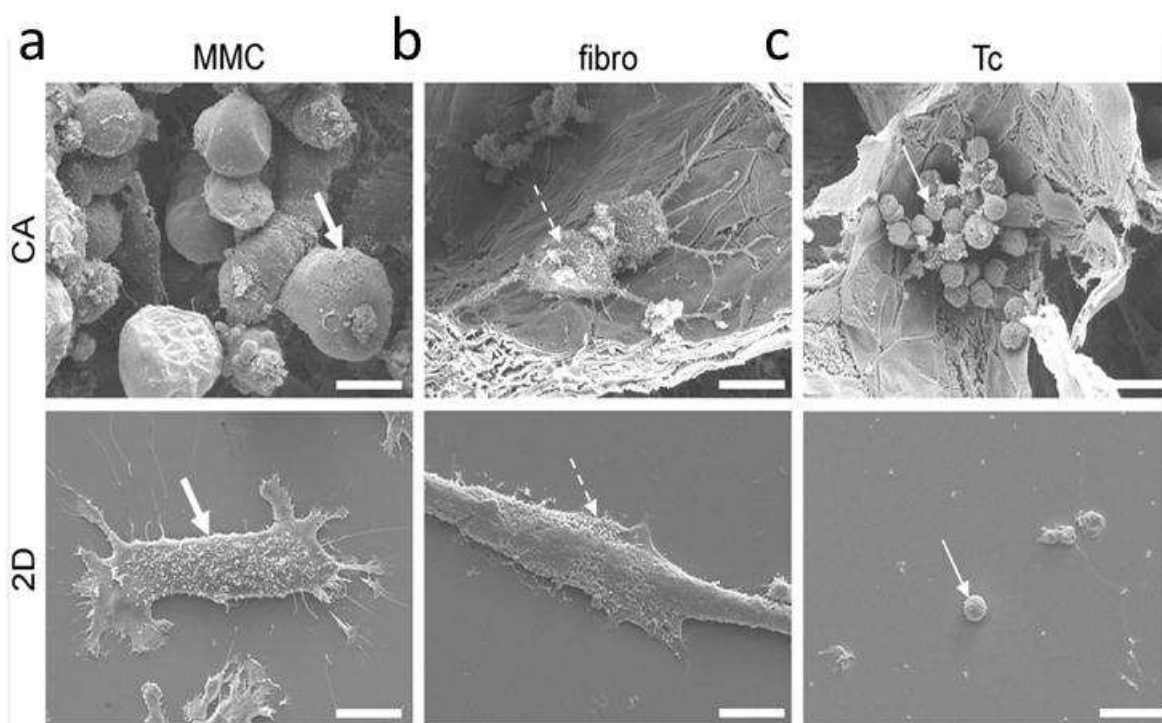

**Supplemental Figure 2.** Morphology of MMC, fibroblast or T cell cultures grown on CA scaffolds or 2D culture plates, visualized by SEM. Images of: (a) MMC, (b) fibroblasts, and (c) T cells cultured on CA (top row) or 2D (bottom row); 2000 $\times$  magnification; scale bar, 10  $\mu$ m. MMC: thick arrow, T cell: thin arrow, fibroblast: thin dashed arrow. Data is representative of two experiments.

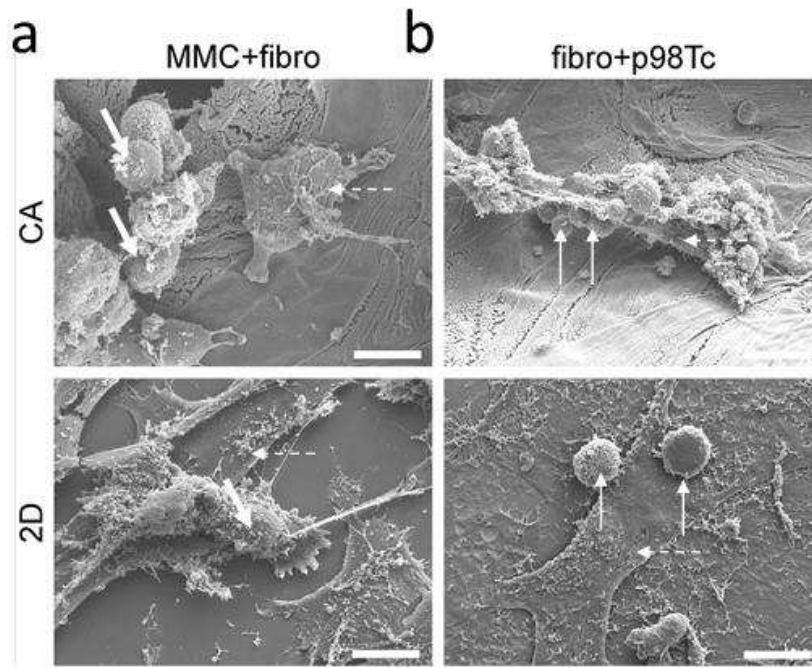

**Supplemental Figure 3.** Morphology of fibroblast co-cultures grown on CA scaffolds or 2D culture plates, visualized by SEM. Images of: (a) MMC and fibroblasts, and (b) p98 T cells and fibroblasts cultured on CA (top row) and 2D (bottom row); 2000 $\times$  magnification; scale bar, 10  $\mu$ m. MMC: thick arrow, T cell: thin arrow, fibroblast: thin dashed arrow. Data is representative of three experiments.
